# Supplementary material for: Long term mortality in sepsis survivors: a population-based study during 15 years
Source: Research Square preprint supplement (doi:10.21203/rs.3.rs-8340179/v1), 2025-12-30
Supplement: Supplementary file 1 [file 70cc5d7a729fa2e51e7abada.pdf]

|                |                                       |                             |
|----------------|---------------------------------------|-----------------------------|
|                |                                       | Total survivors (n=237,075) |
| Age (years)    |                                       | 72.3(18.7)                  |
|                | <15                                   | 5862 (2.47%)                |
|                | 15 - 44                               | 13,180 (5.56%)              |
|                | 45 - 64                               | 37,783 (15.9%)              |
|                | 65 - 74                               | 42,645 (18%)                |
|                | 75 - 84                               | 75,103 (31.7%)              |
|                | >84                                   | 62,502 (26.4%)              |
| Gender         |                                       |                             |
|                | Male                                  | 132,514 (70.7%)             |
| Charlson Index |                                       | 2.36 (2.12)                 |
|                | =0                                    | 45,401 (19.2%)              |
|                | 1 - 2                                 | 98,915 (41.7%)              |
|                | 3 - 4                                 | 62,386 (26.3%)              |
|                | ≥ 5                                   | 30,373 (12.8%)              |
| Comorbidities  |                                       |                             |
|                | Chronic kidney disease                | 69,081 (29.1%)              |
|                | Chronic obstructive pulmonary disease | 60,455 (25.5%)              |
|                | Active neoplasms                      | 59,370 (25%)                |
|                | Uncomplicated diabetes mellitus       | 54,338 (22.9%)              |
|                | Congestive heart failure              | 50,152 (21.2%)              |
|                | Liver disease                         | 28,612 (12.1%)              |
|                | Dementia                              | 18,644 (7.86%)              |
|                | Cerebrovascular disease               | 17,423 (7.3%)               |
|                | Complicated diabetes mellitus         | 12,631 (5.3%)               |
|                | Liver Cirrhosis                       | 8,710 (3.7%)                |
|                | Disseminated neoplasms                | 9,852 (4.16%)               |
|                | Human Immunodeficiency virus          | 2,096 (0.8%)                |
| Sepsis Source  |                                       |                             |
|                | Genitourinary                         | 98,641 (41.6%)              |
|                | Respiratory                           | 75,831 (32%)                |
|                | Unknown                               | 26,950 (11.4%)              |
|                | Abdomin-biliary                       | 23,837 (10.1%)              |
|                | Related to intravascular devices      | 17,862 (7.53%)              |

|               |                          |                |
|---------------|--------------------------|----------------|
|               | Tissues and soft tissues | 10,901 (4.6%)  |
|               | Others                   | 8,112 (3.42%)  |
|               | Endocarditis             | 2,687 (1.13%)  |
|               | Central Nervous System   | 1,839 (0.78%)  |
| Hospital stay |                          |                |
|               | <4 days                  | 37,225 (15.7%) |
|               | 4 - 7 days               | 55,853 (23.6%) |
|               | 8 - 14 days              | 67,673 (28.5%) |
|               | 15 - 21 days             | 30,515 (12.9%) |
|               | 22 - 28 days             | 15,482 (6.53%) |
|               | >28 days                 | 30,327 (12.8%) |

Table 1. Baseline characteristics of surviving patients at hospital discharge.
